# Supplementary material
Source: publisher site journal article supplement (https://www.spandidos-publications.com/2570/downloadSupplementary)

Figure S1. Original images of protein bands and sizes from western blotting. A) Total NRF2 protein expression level in the kidney. B) Nuclear NRF2 protein expression level in the kidney. C) NQO1, GCLM and HO1 protein expression levels in the kidney following IR injury. D) BMAL1 protein expression level in the kidney following IR injury. E) Nuclear NRF2 protein expression level in the kidney following IR injury.

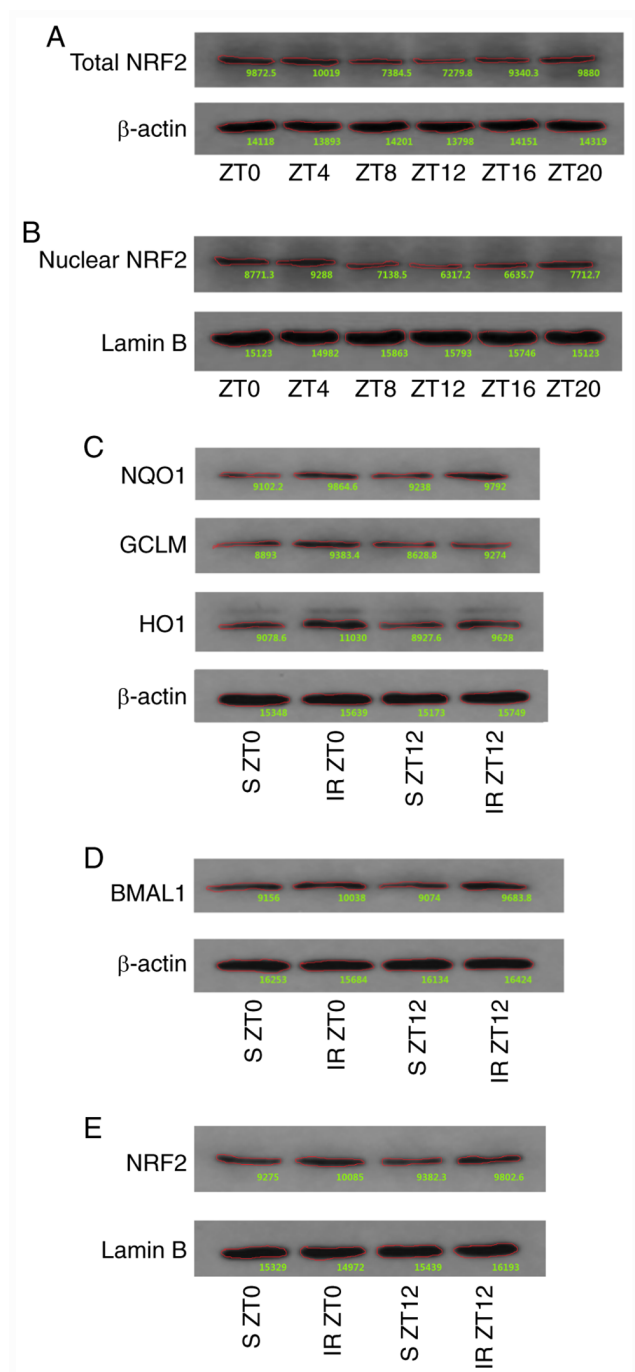

Supplement: Supplementary file 1 [file downloadSupplementary]
